# Supplementary material for: Comparative Analyses of Acacia Plastomes to Detect Mutational Hotspots and Barcode Sites for the Identification of Important Timber Species
Source: MDPI journal article supplement (doi:10.3390/f15020306), 2024-02-05

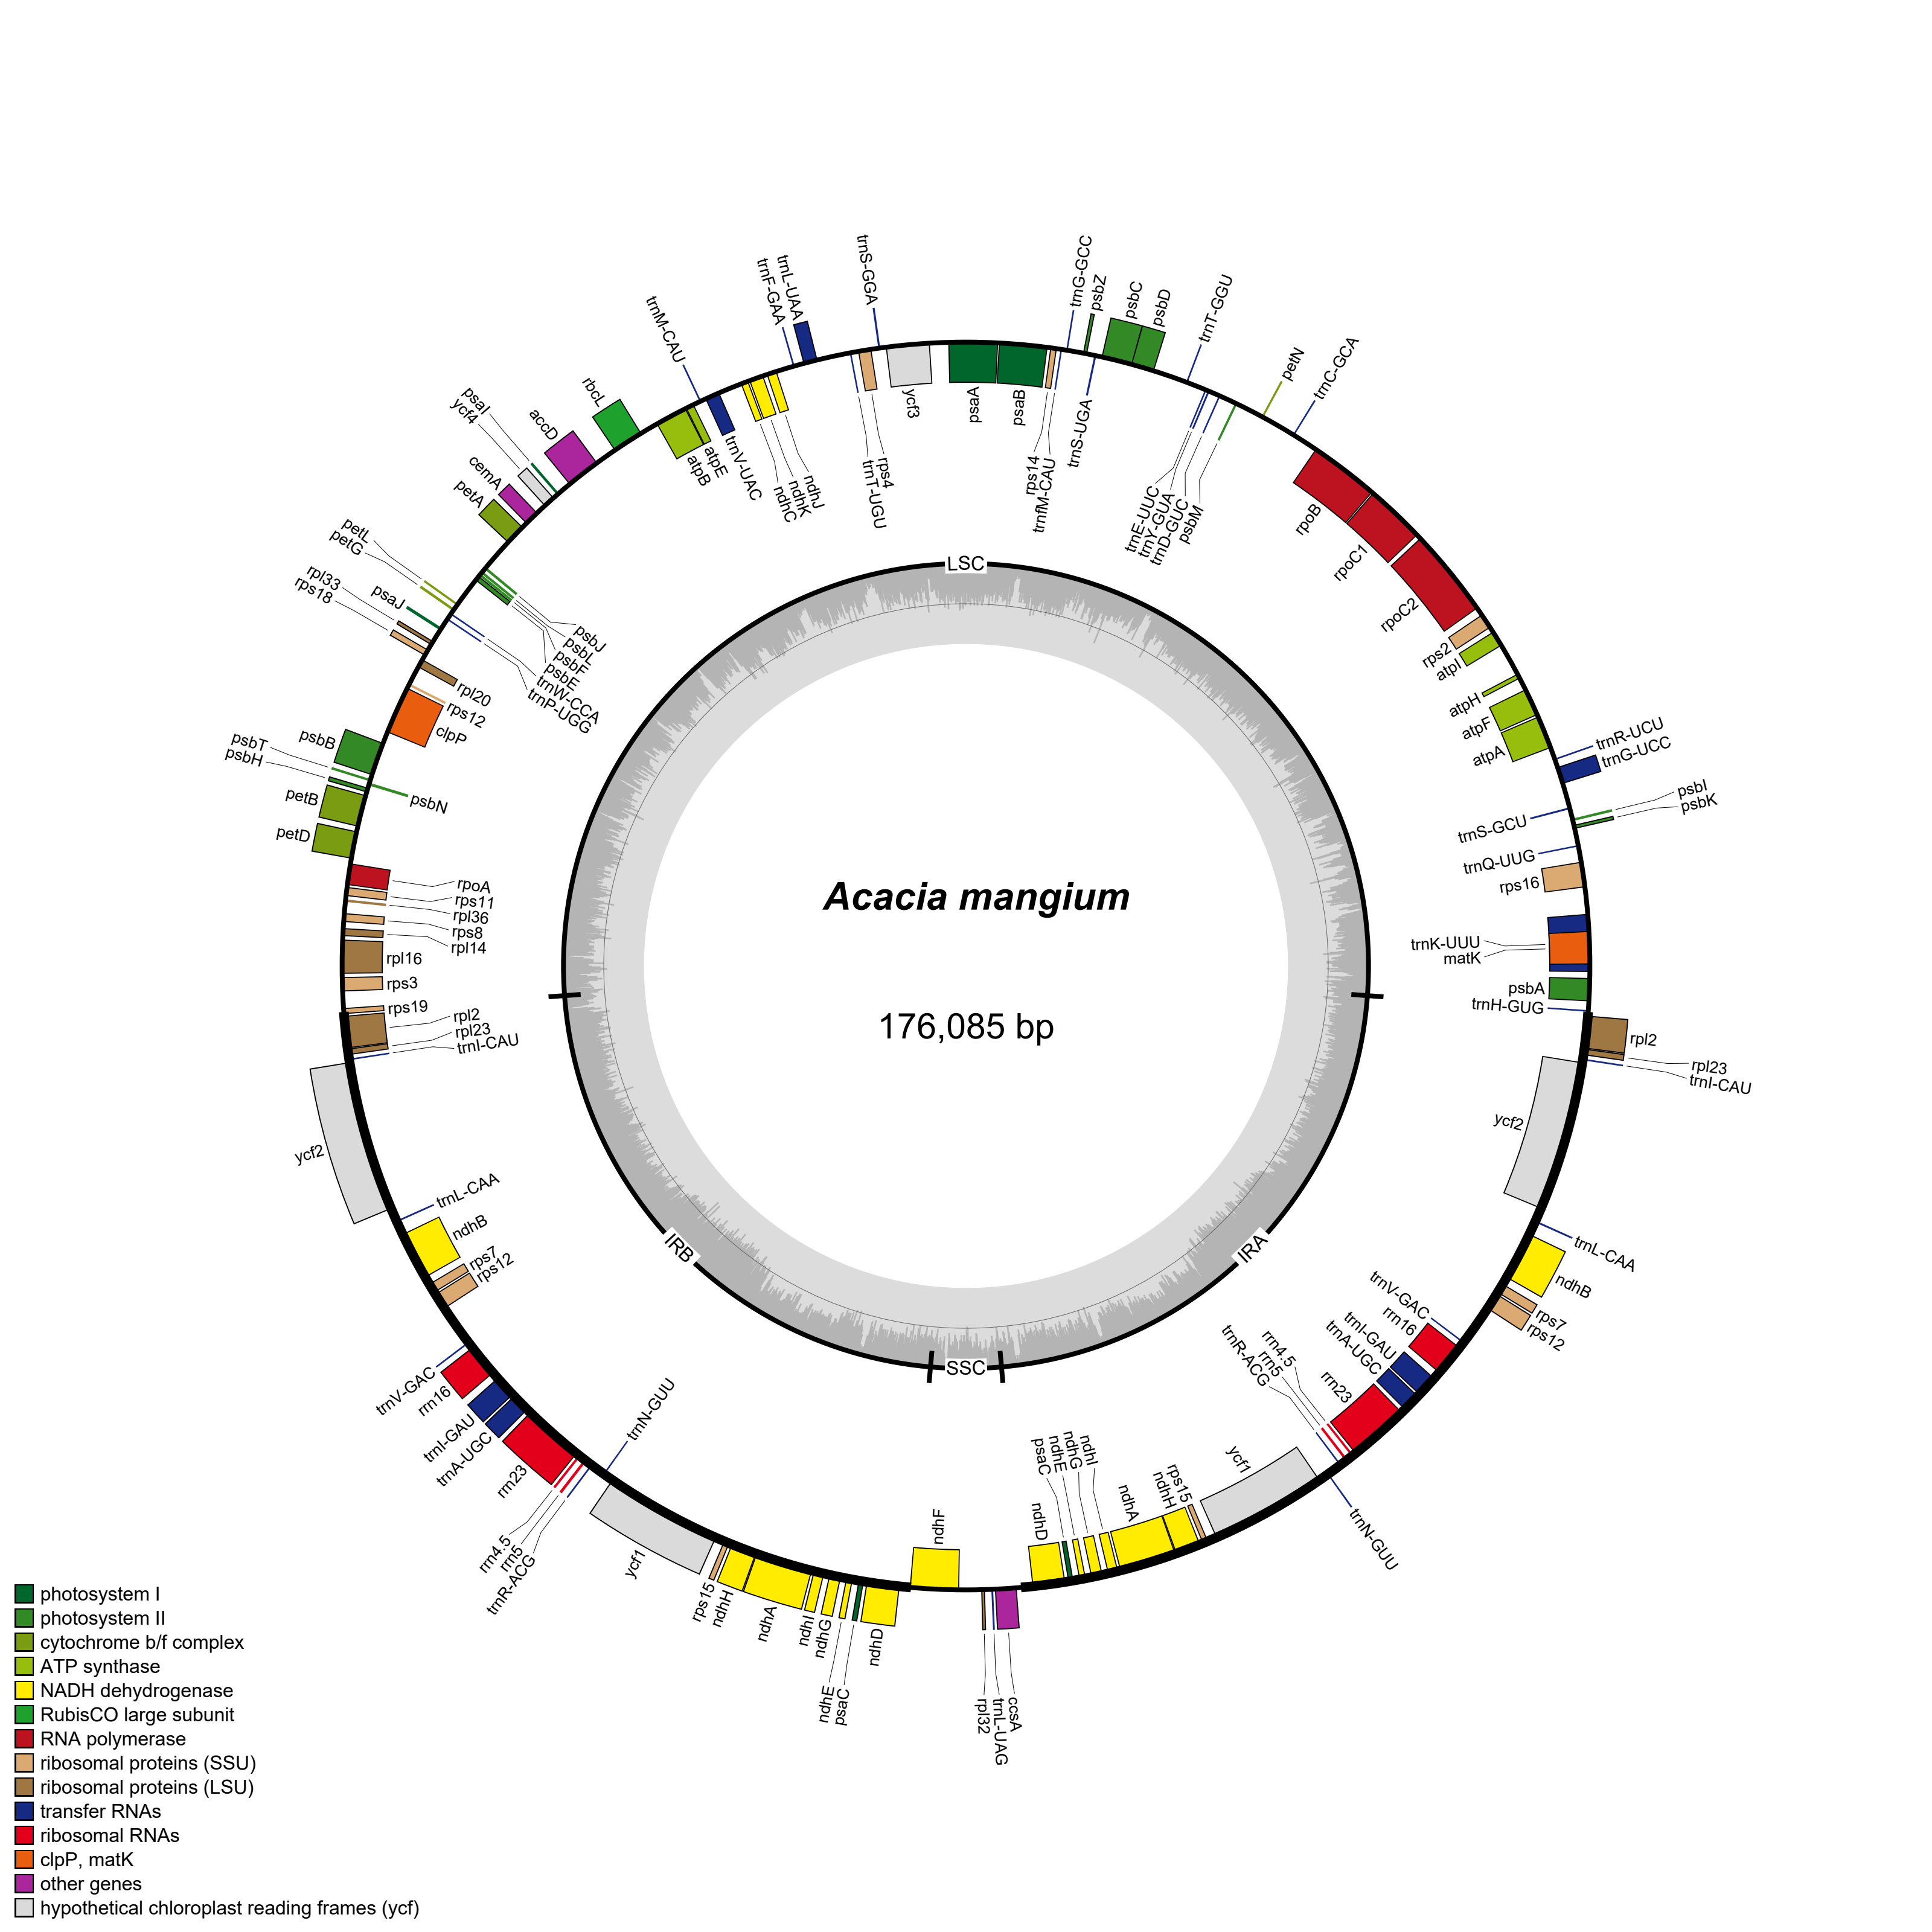

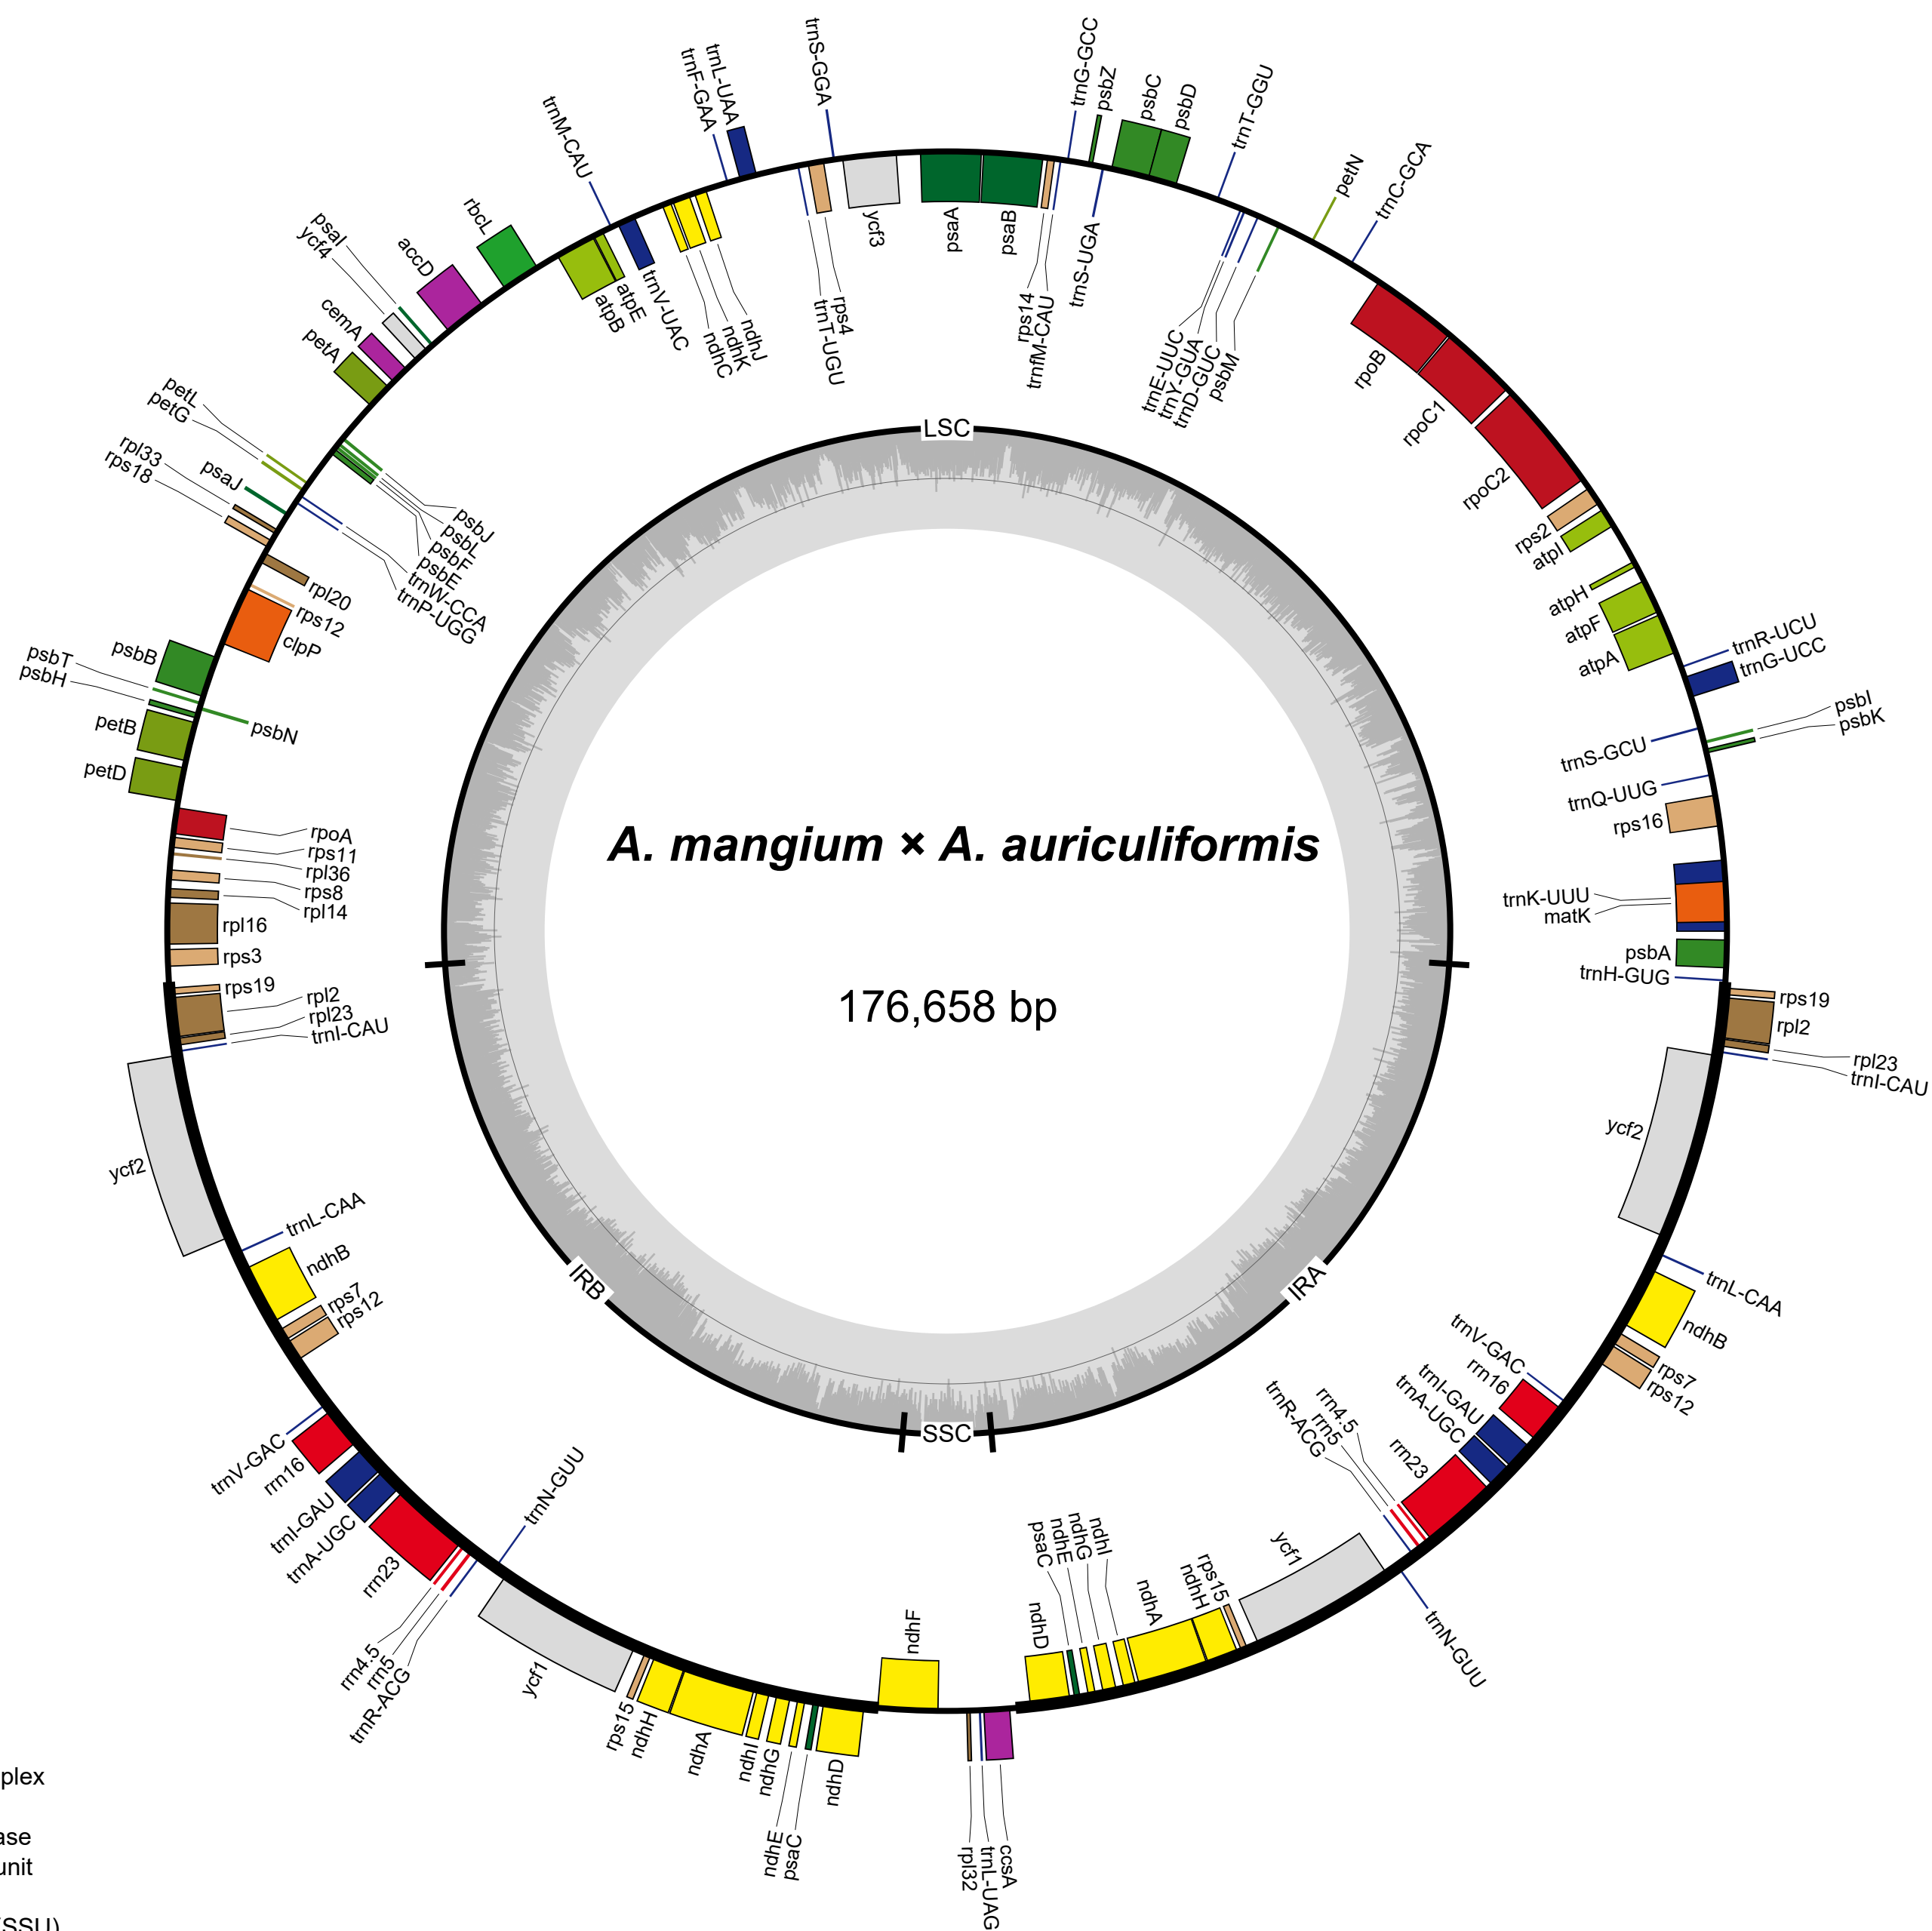

-  photosystem I
-  photosystem II
-  cytochrome b/f complex
-  ATP synthase
-  NADH dehydrogenase
-  RubisCO large subunit
-  RNA polymerase
-  ribosomal proteins (SSU)
-  ribosomal proteins (LSU)
-  transfer RNAs
-  ribosomal RNAs
-  clpP, matK
-  other genes
-  hypothetical chloroplast reading frames (ycf)

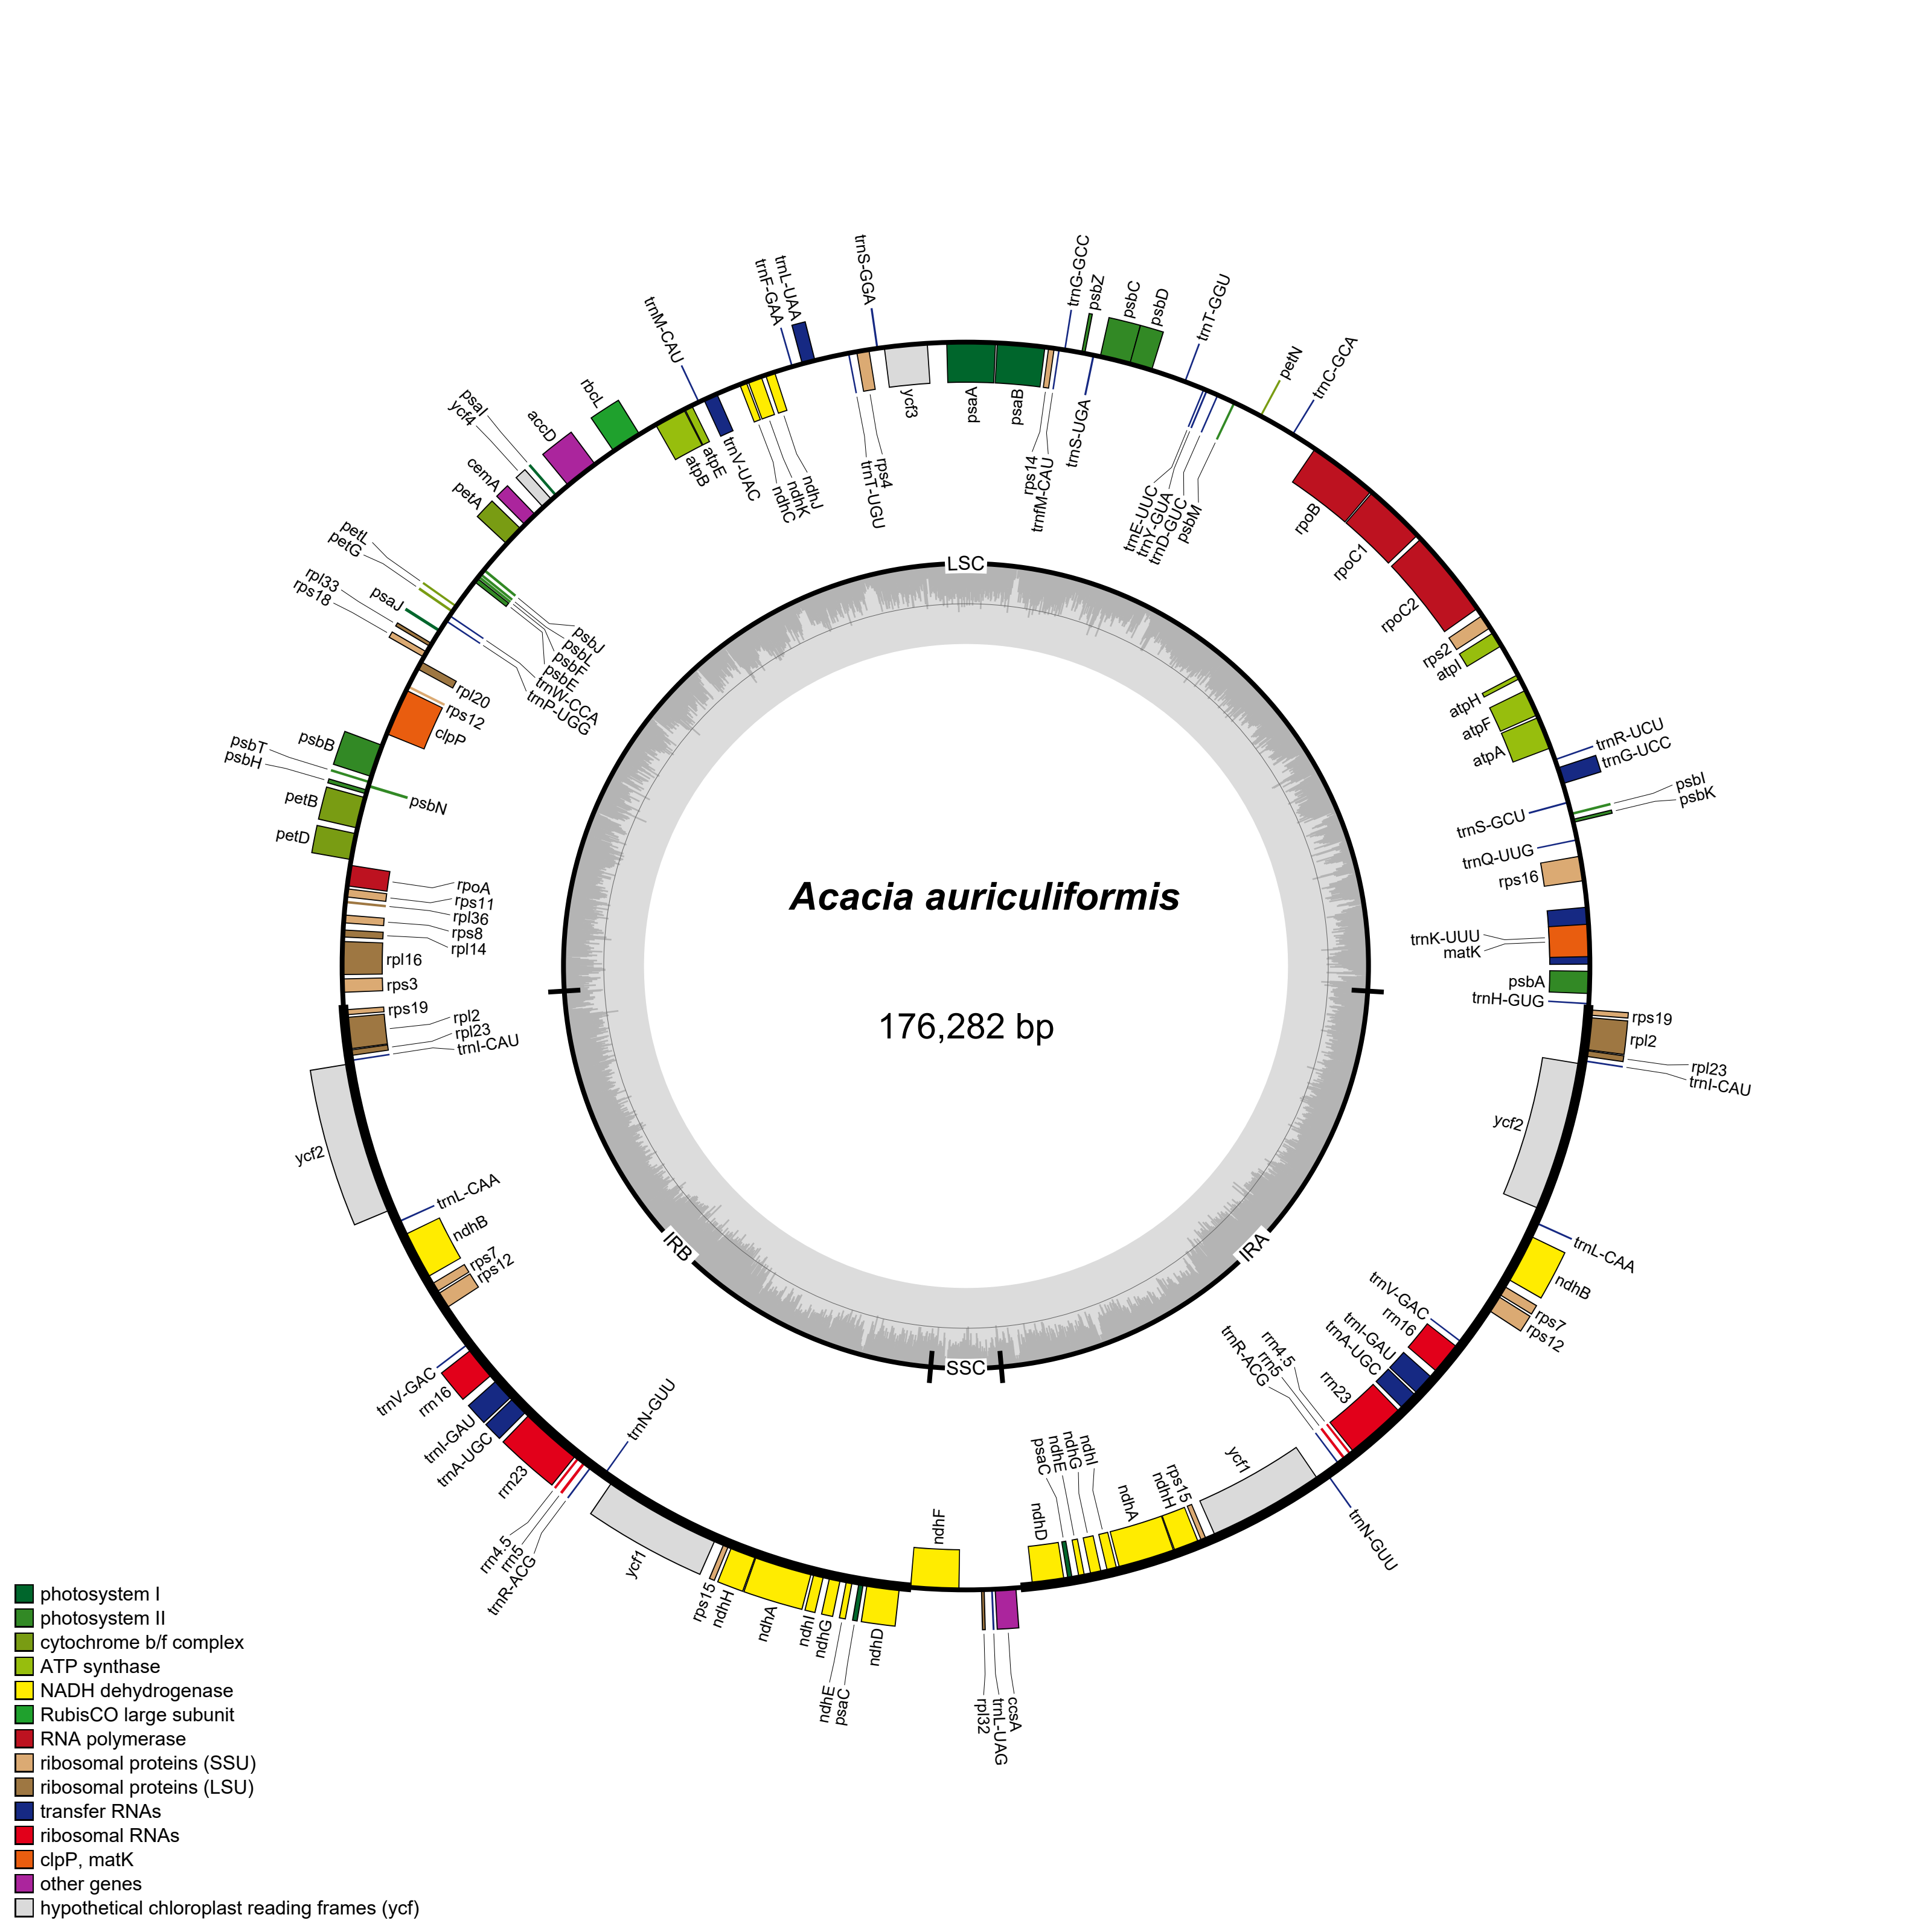





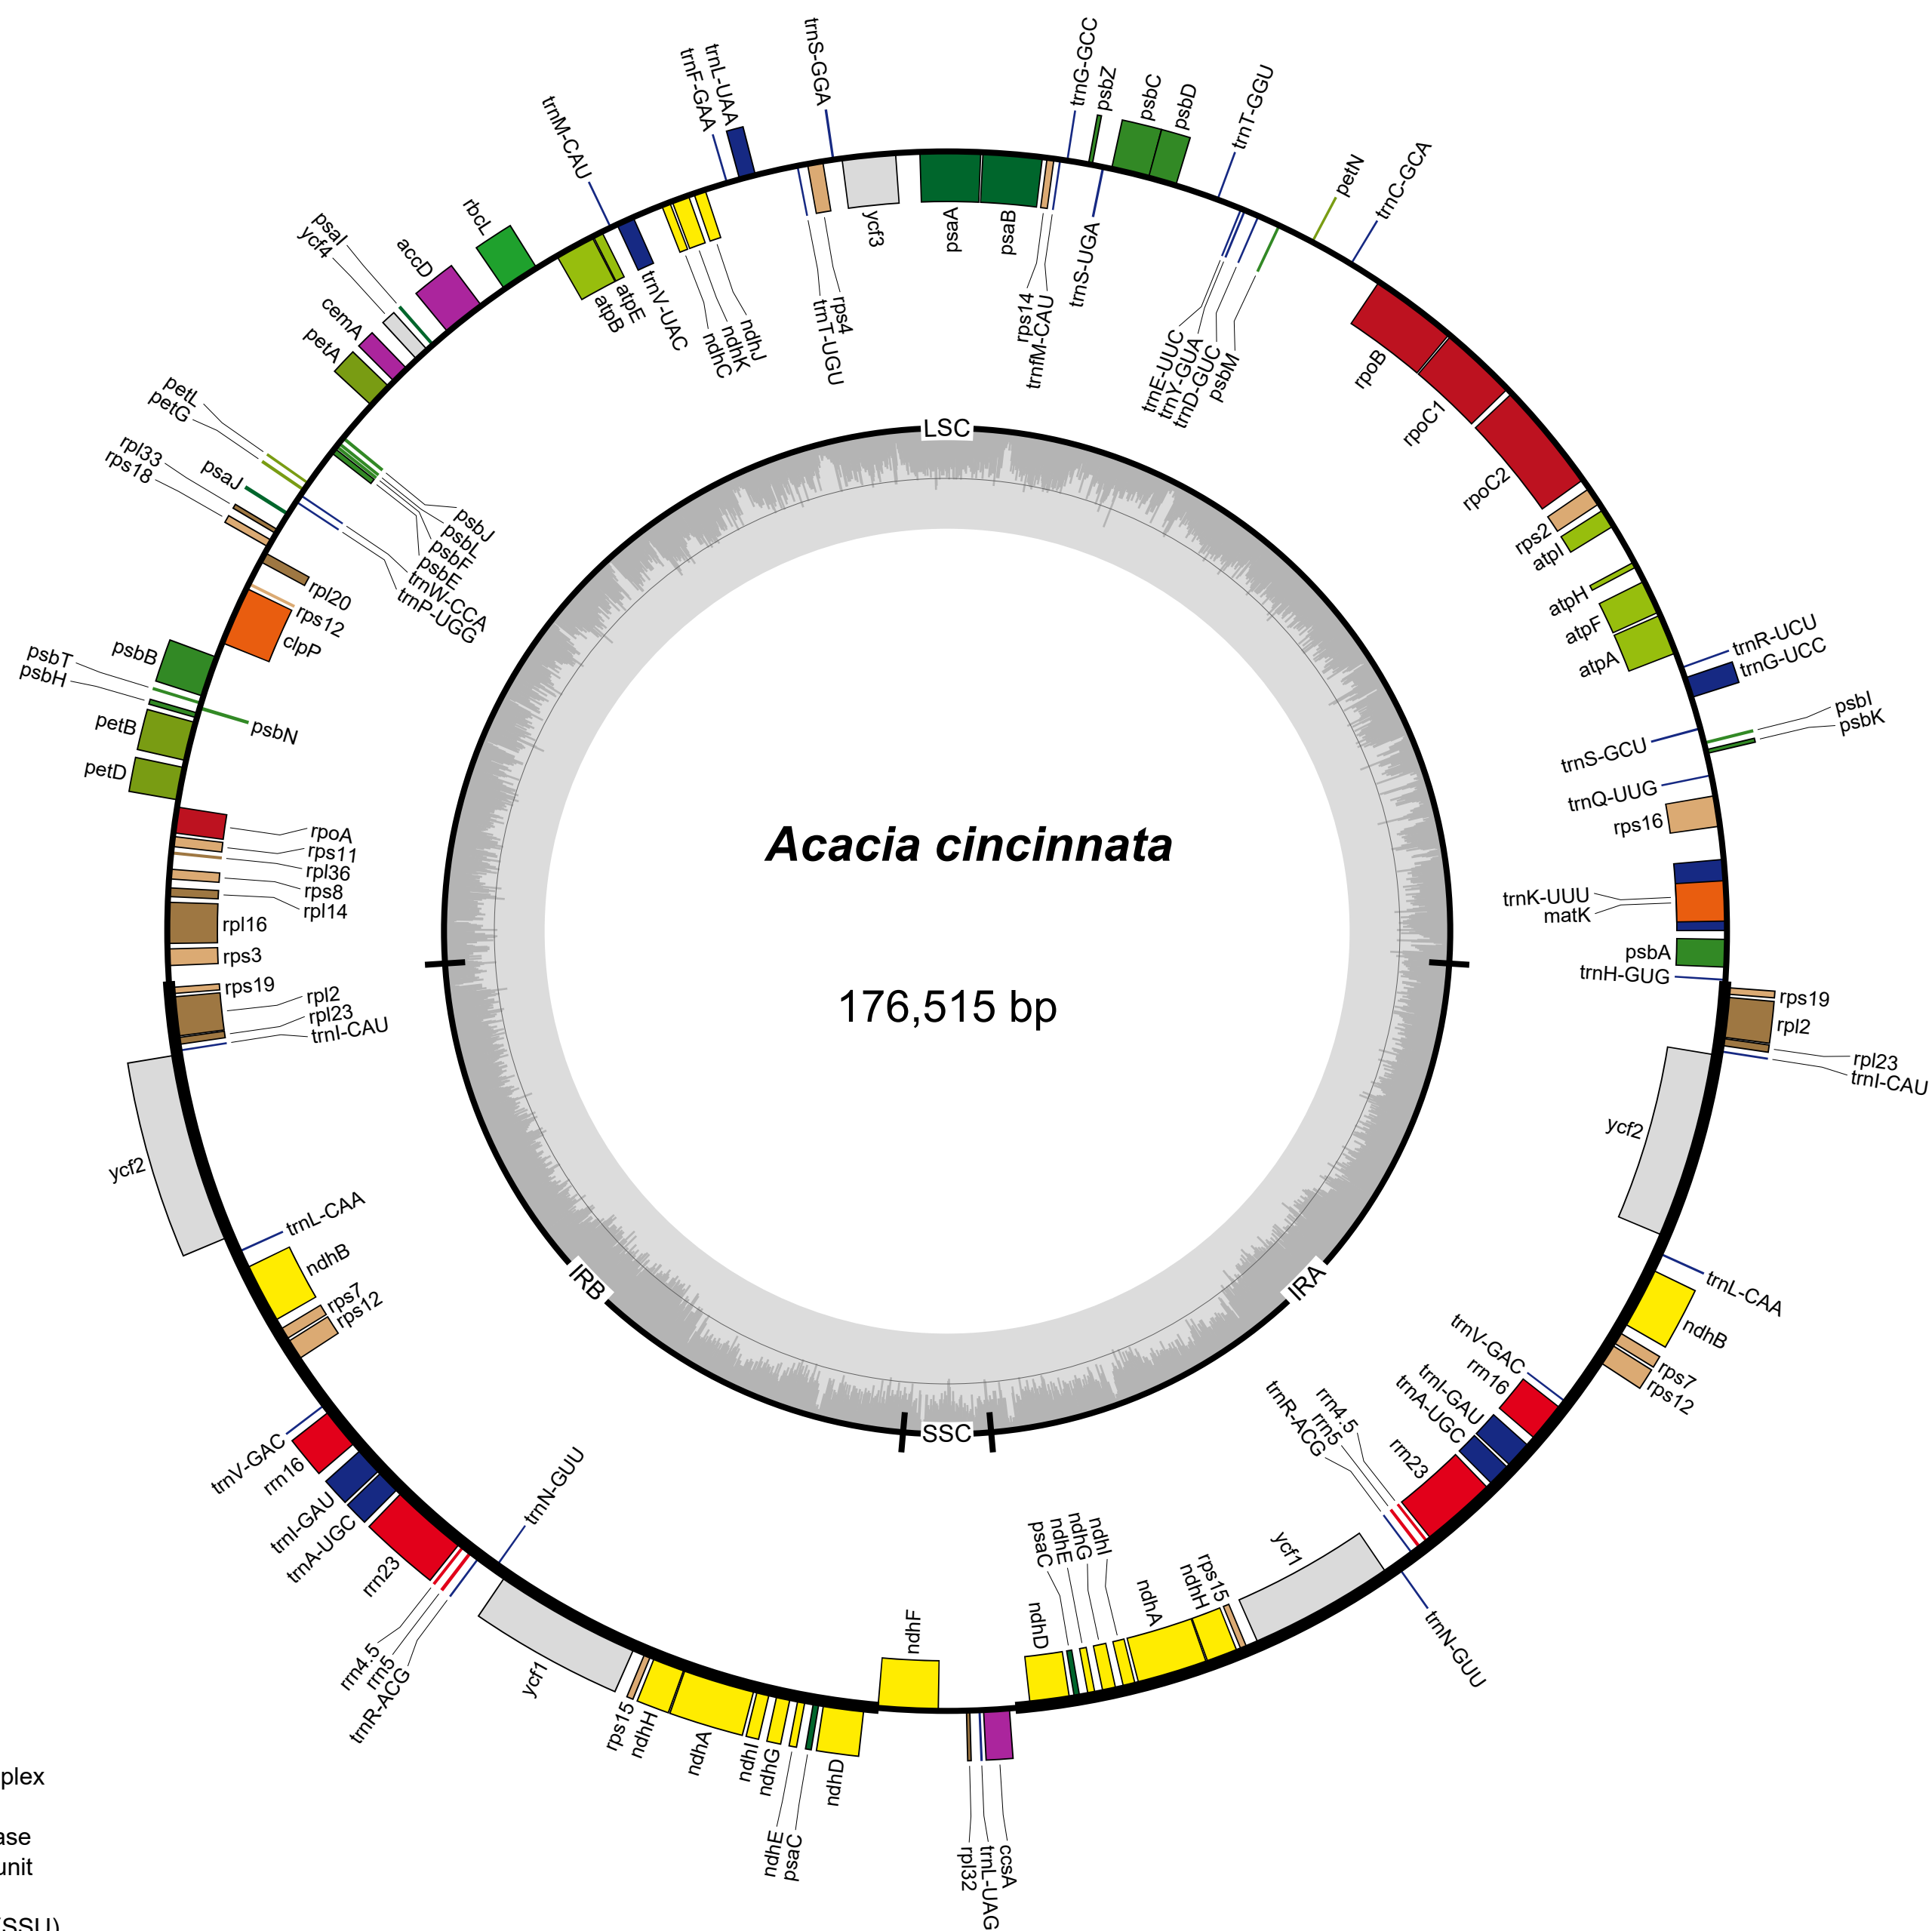

-  photosystem I
-  photosystem II
-  cytochrome b/f complex
-  ATP synthase
-  NADH dehydrogenase
-  RubisCO large subunit
-  RNA polymerase
-  ribosomal proteins (SSU)
-  ribosomal proteins (LSU)
-  transfer RNAs
-  ribosomal RNAs
-  clpP, matK
-  other genes
-  hypothetical chloroplast reading frames (ycf)

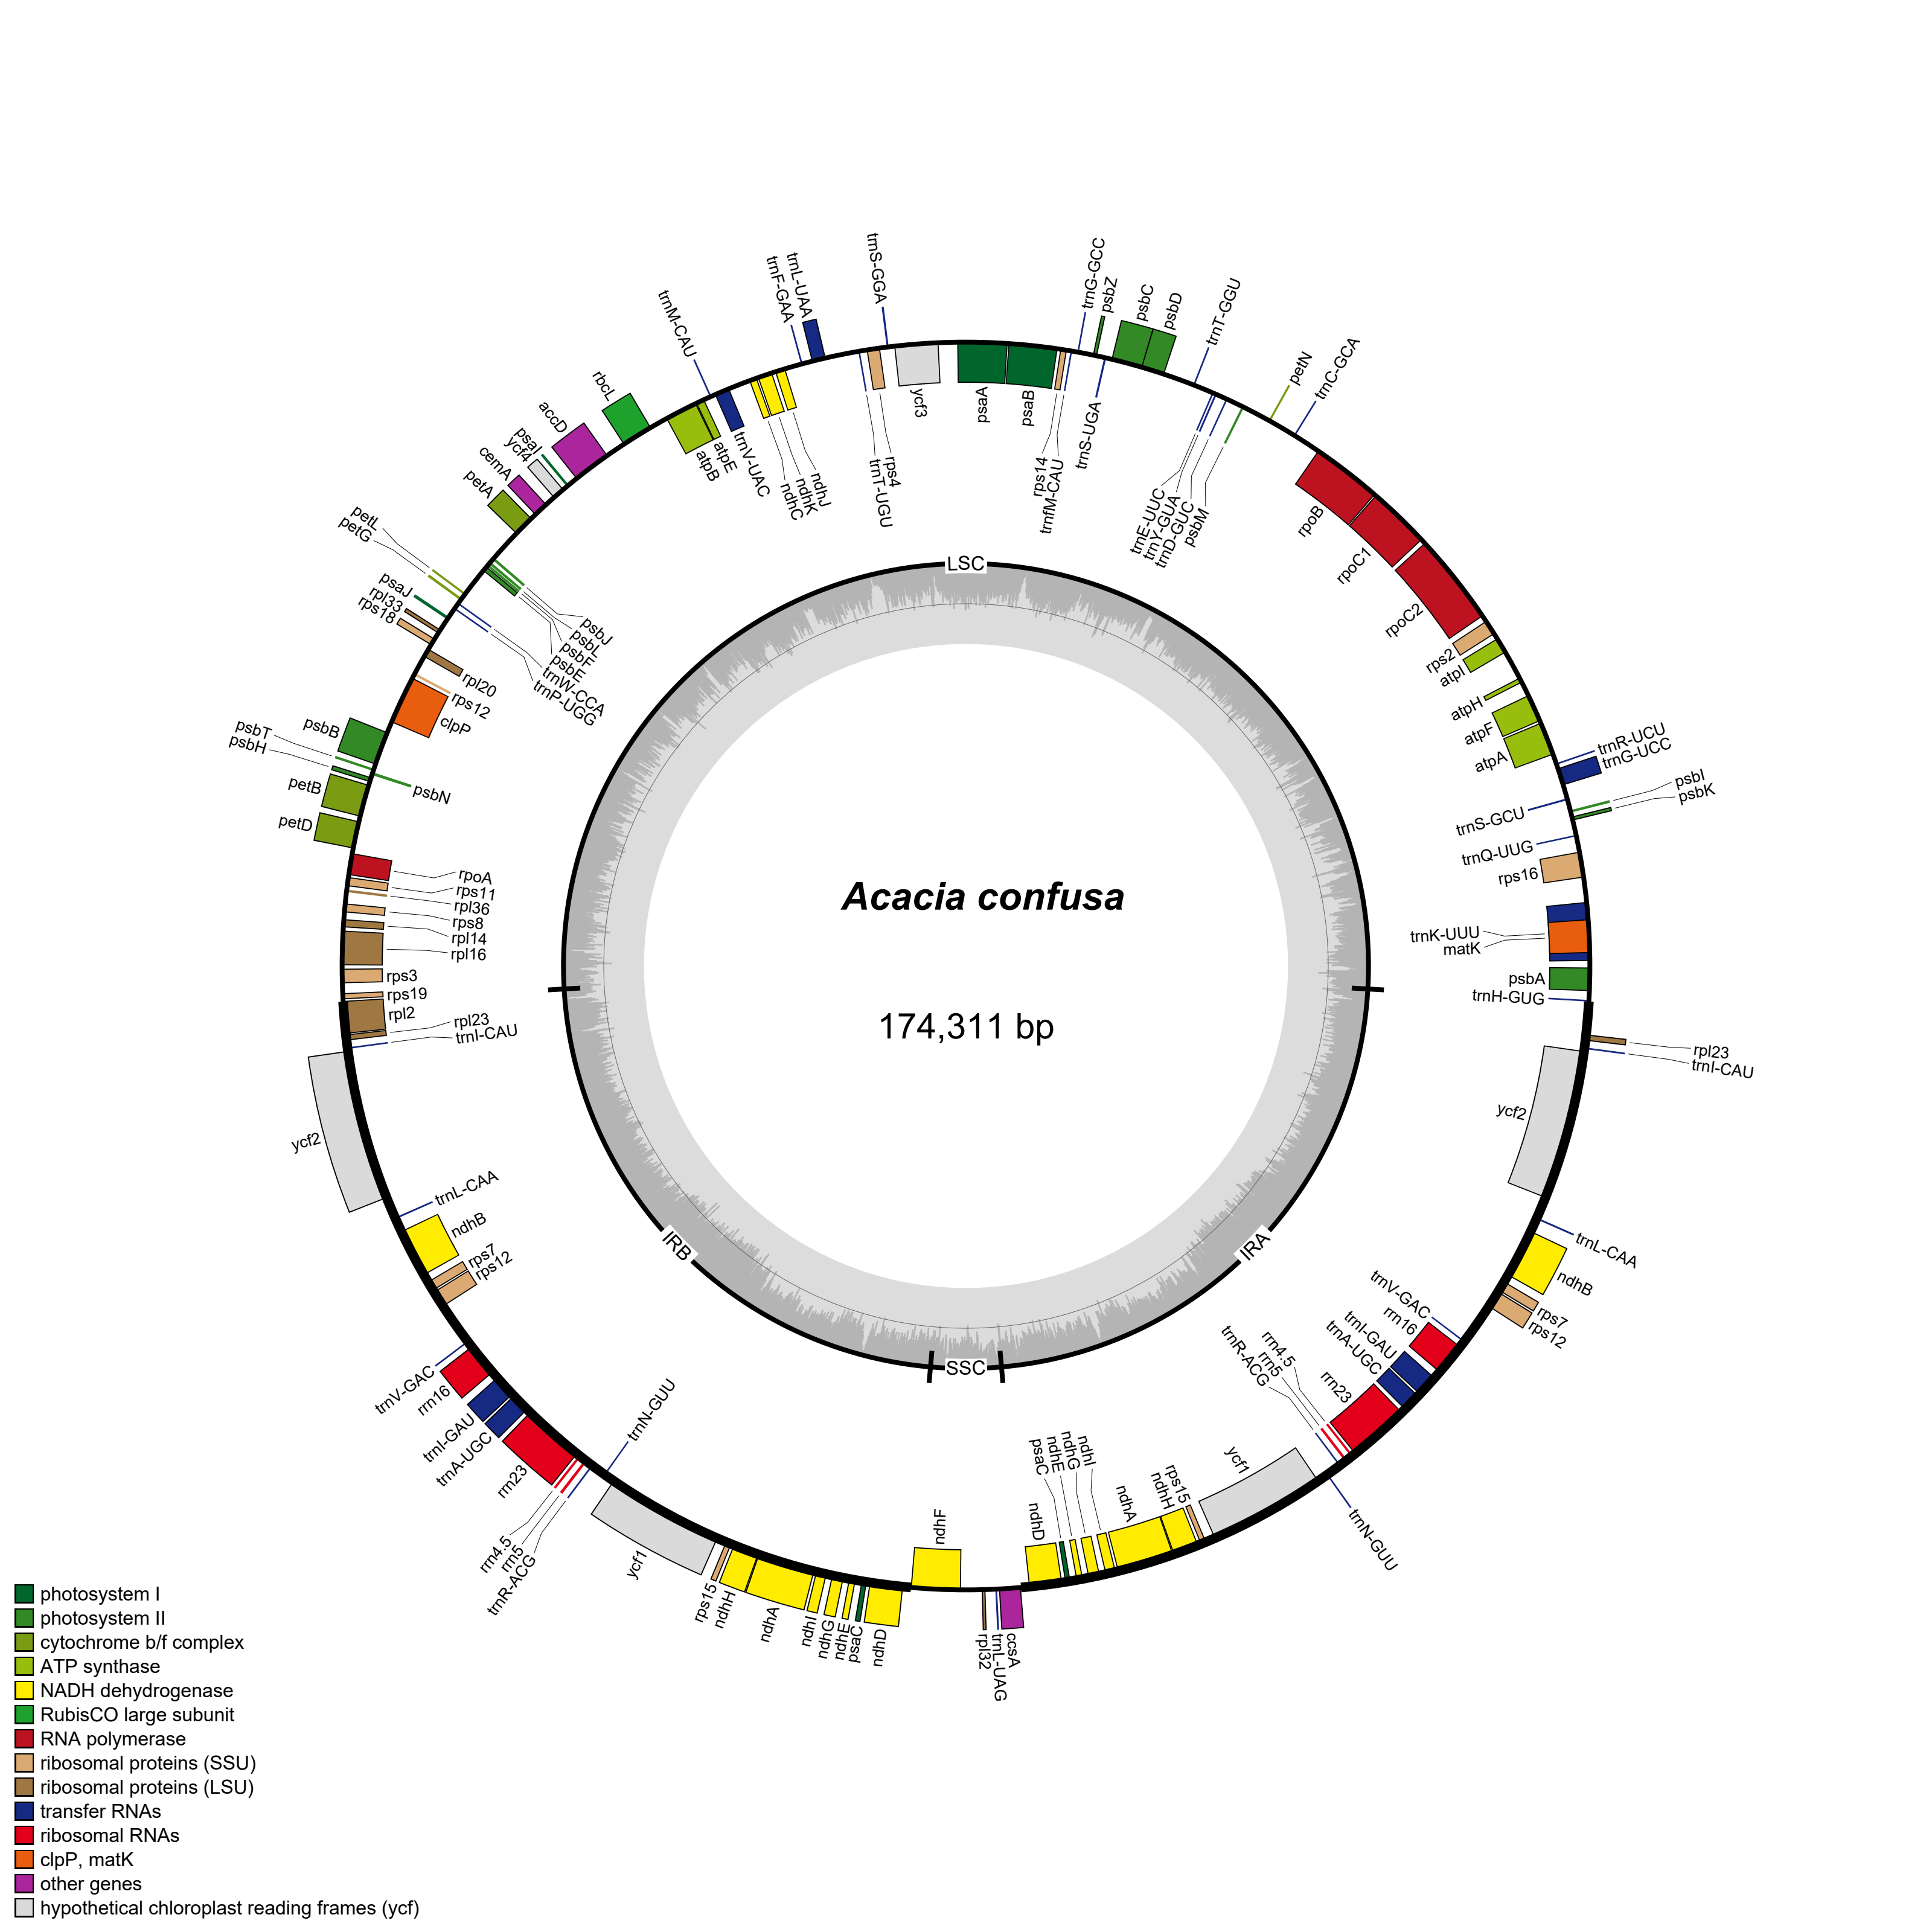

Supplement: s1 [file s1]
