# Supplementary material for: Comparative Analyses of Acacia Plastomes to Detect Mutational Hotspots and Barcode Sites for the Identification of Important Timber Species
Source: MDPI journal article supplement (doi:10.3390/f15020306), 2024-02-05
Supplement: s1 [file s1]

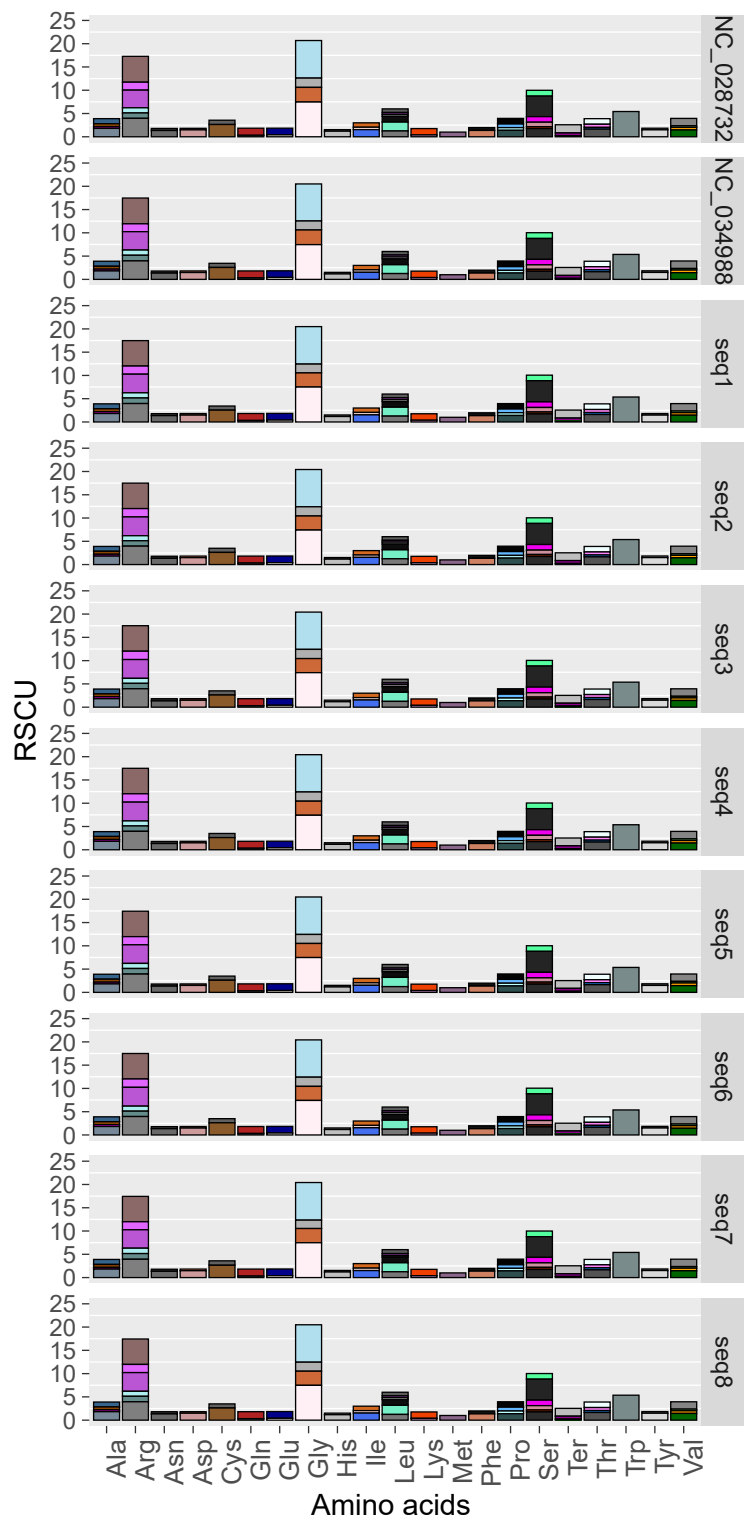

### Codon

|         |         |         |         |
|---------|---------|---------|---------|
| Ala-GCA | Gln-CAA | Leu-CUU | Ser-UCG |
| Ala-GCC | Gln-CAG | Leu-UUA | Ser-UCU |
| Ala-GCG | Glu-GAA | Leu-UUG | Ter-UAA |
| Ala-GCU | Glu-GAG | Lys-AAA | Ter-UAG |
| Arg-AGA | Gly-GGA | Lys-AAG | Ter-UGA |
| Arg-AGG | Gly-GGC | Met-AUG | Thr-ACA |
| Arg-CGA | Gly-GGG | Phe-UUC | Thr-ACC |
| Arg-CGC | Gly-GGU | Phe-UUU | Thr-ACG |
| Arg-CGG | His-CAC | Pro-CCA | Thr-ACU |
| Arg-CGU | His-CAU | Pro-CCC | Trp-UGG |
| Asn-AAC | Ile-AUA | Pro-CCG | Tyr-UAC |
| Asn-AAU | Ile-AUC | Pro-CCU | Tyr-UAU |
| Asp-GAC | Ile-AUU | Ser-AGC | Val-GUA |
| Asp-GAU | Leu-CUA | Ser-AGU | Val-GUC |
| Cys-UGC | Leu-CUC | Ser-UCA | Val-GUG |
| Cys-UGU | Leu-CUG | Ser-UCC | Val-GUU |
