# Supplementary figures and images for: Comparative Analyses of Acacia Plastomes to Detect Mutational Hotspots and Barcode Sites for the Identification of Important Timber Species
Source: MDPI journal article supplement (doi:10.3390/f15020306), 2024-02-05

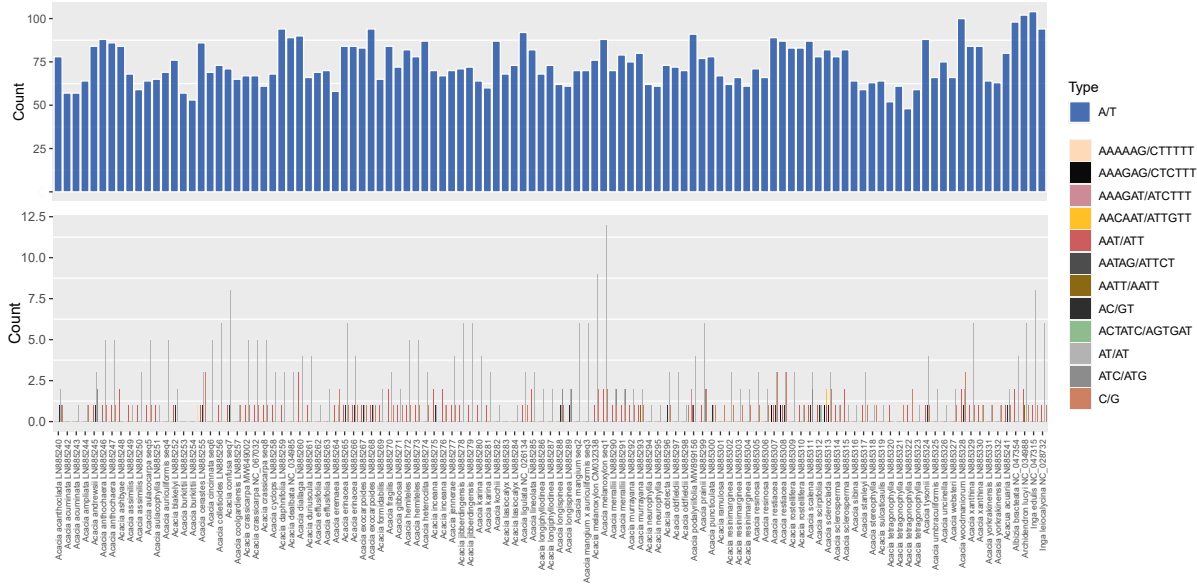

Supplement: s1 [file s1]

### CDS sequences of Chloroplast

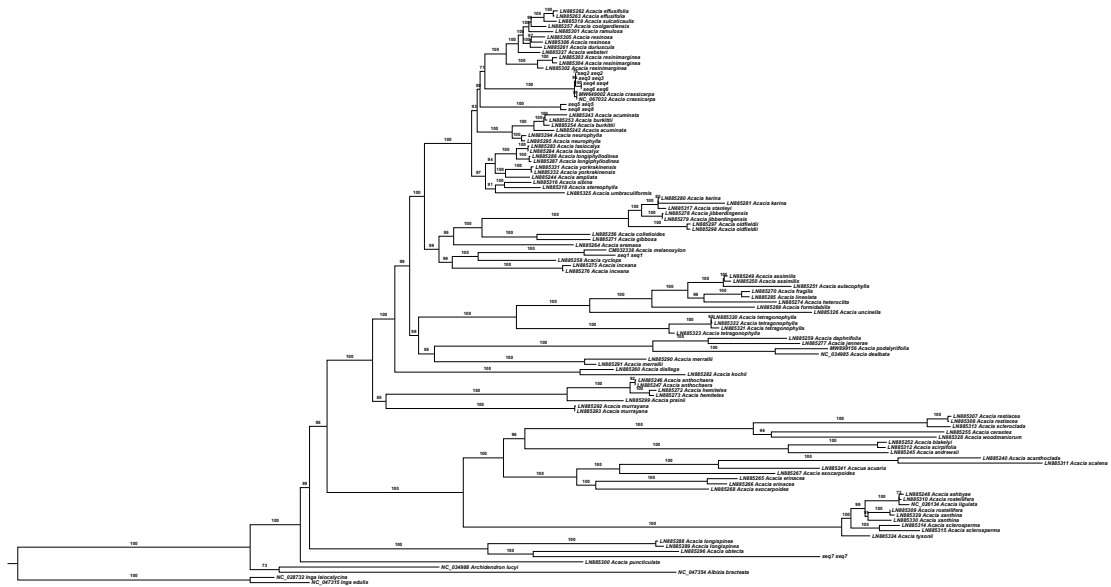

Supplement: s1 [file s1]

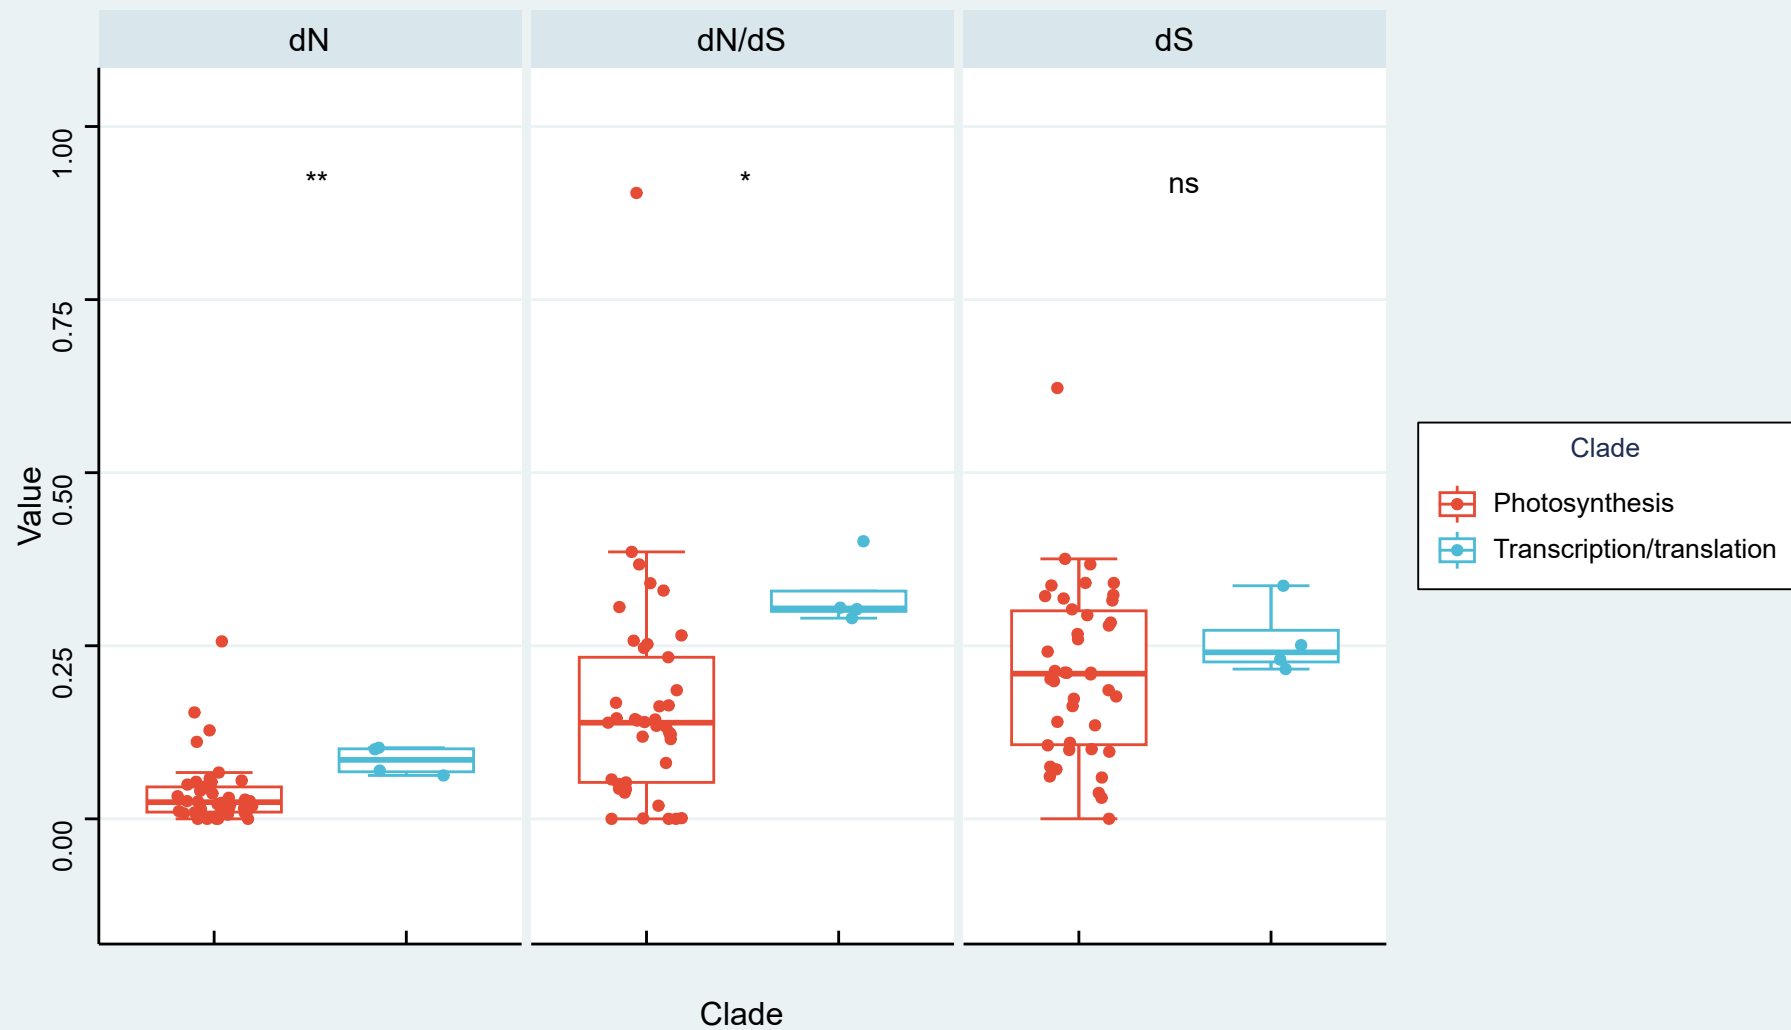

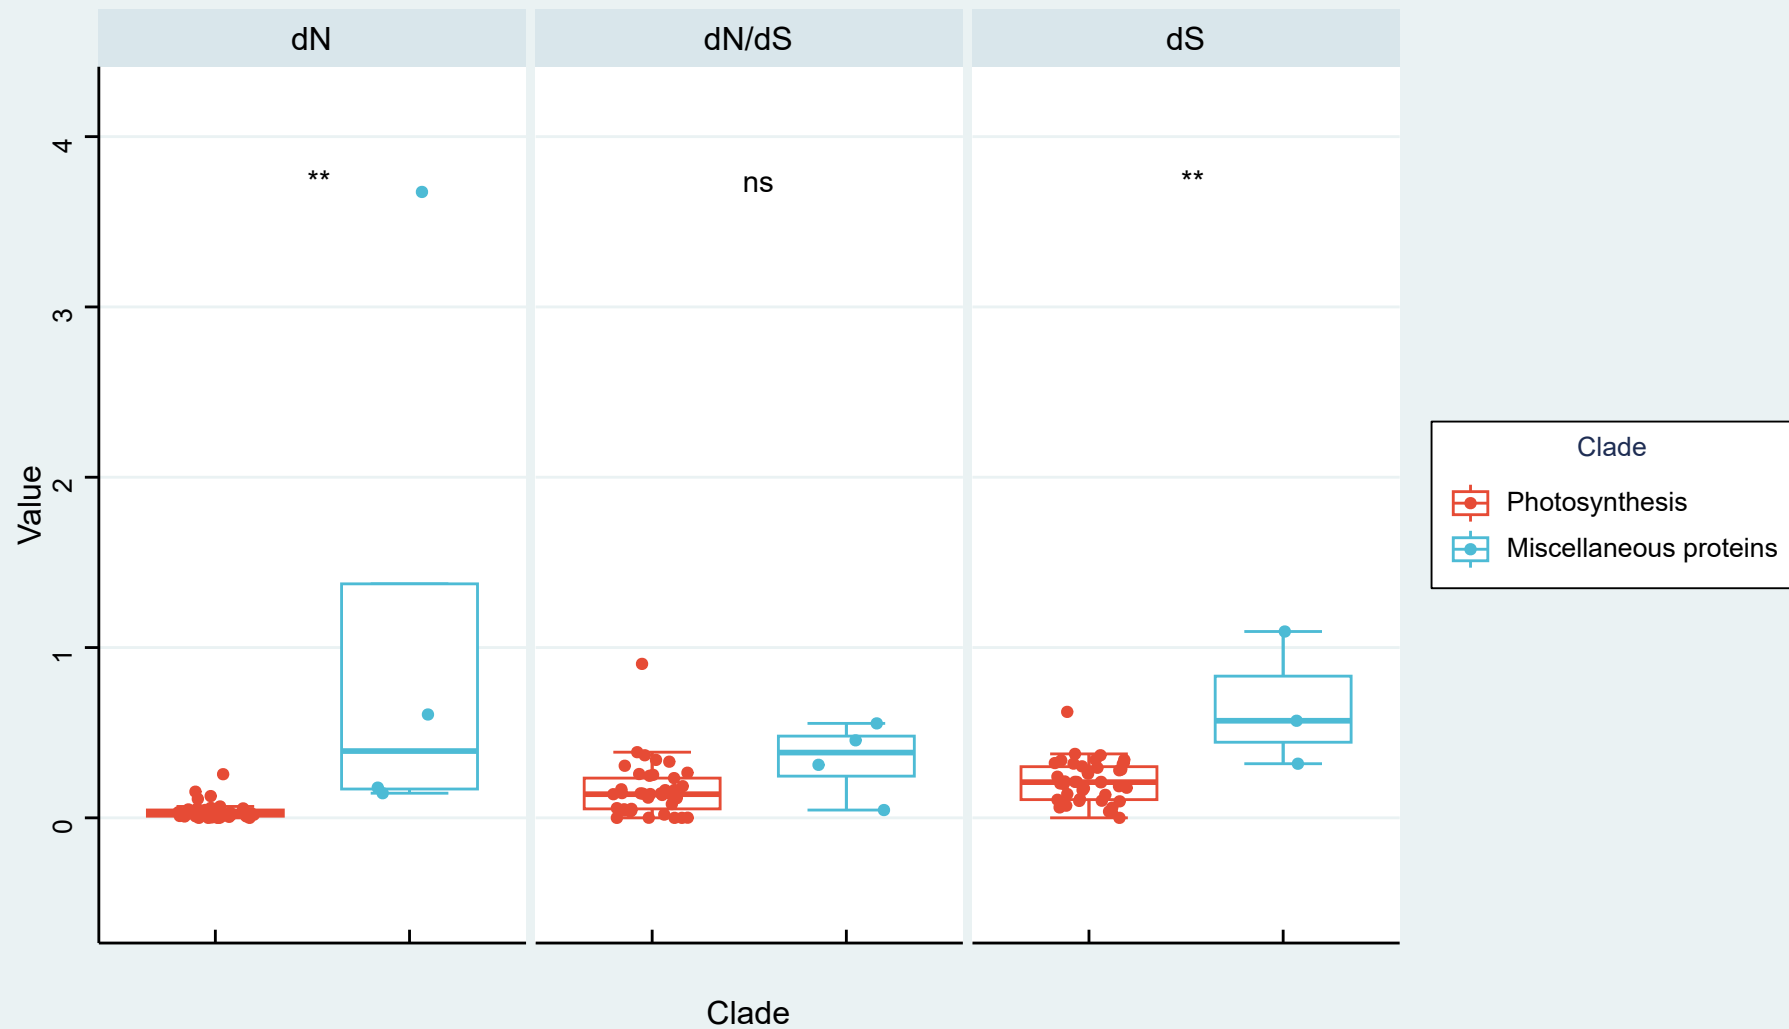

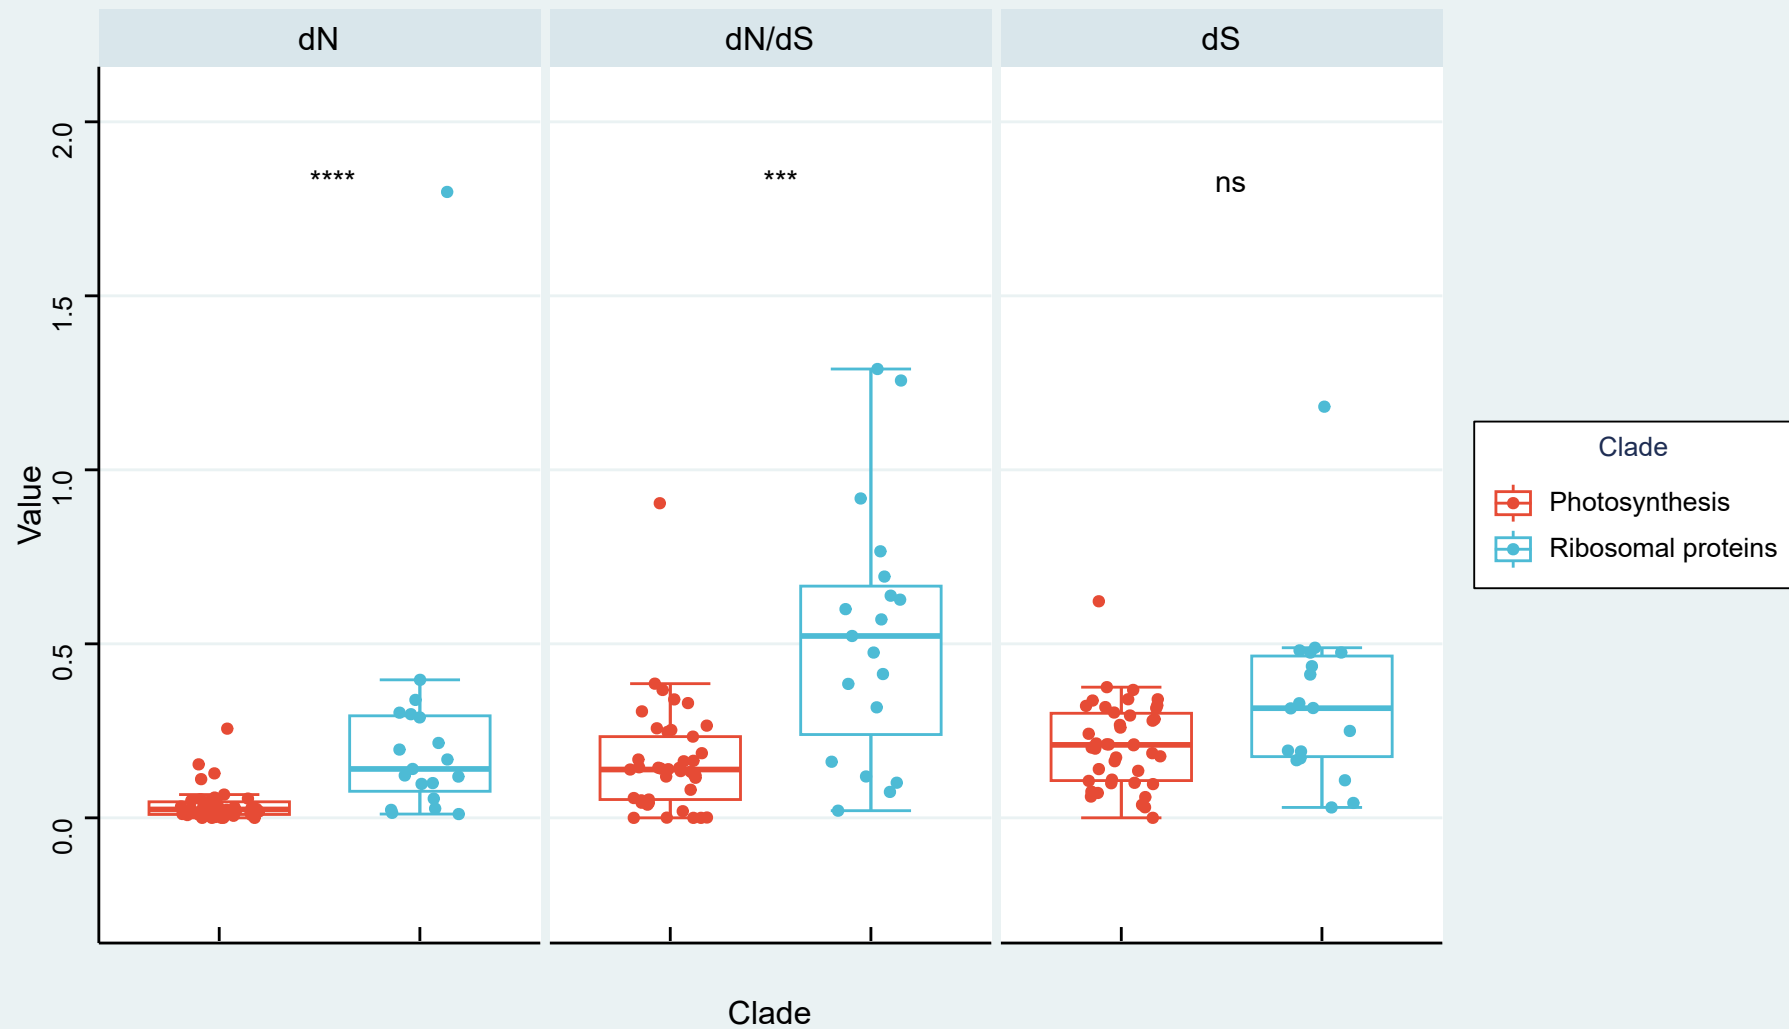

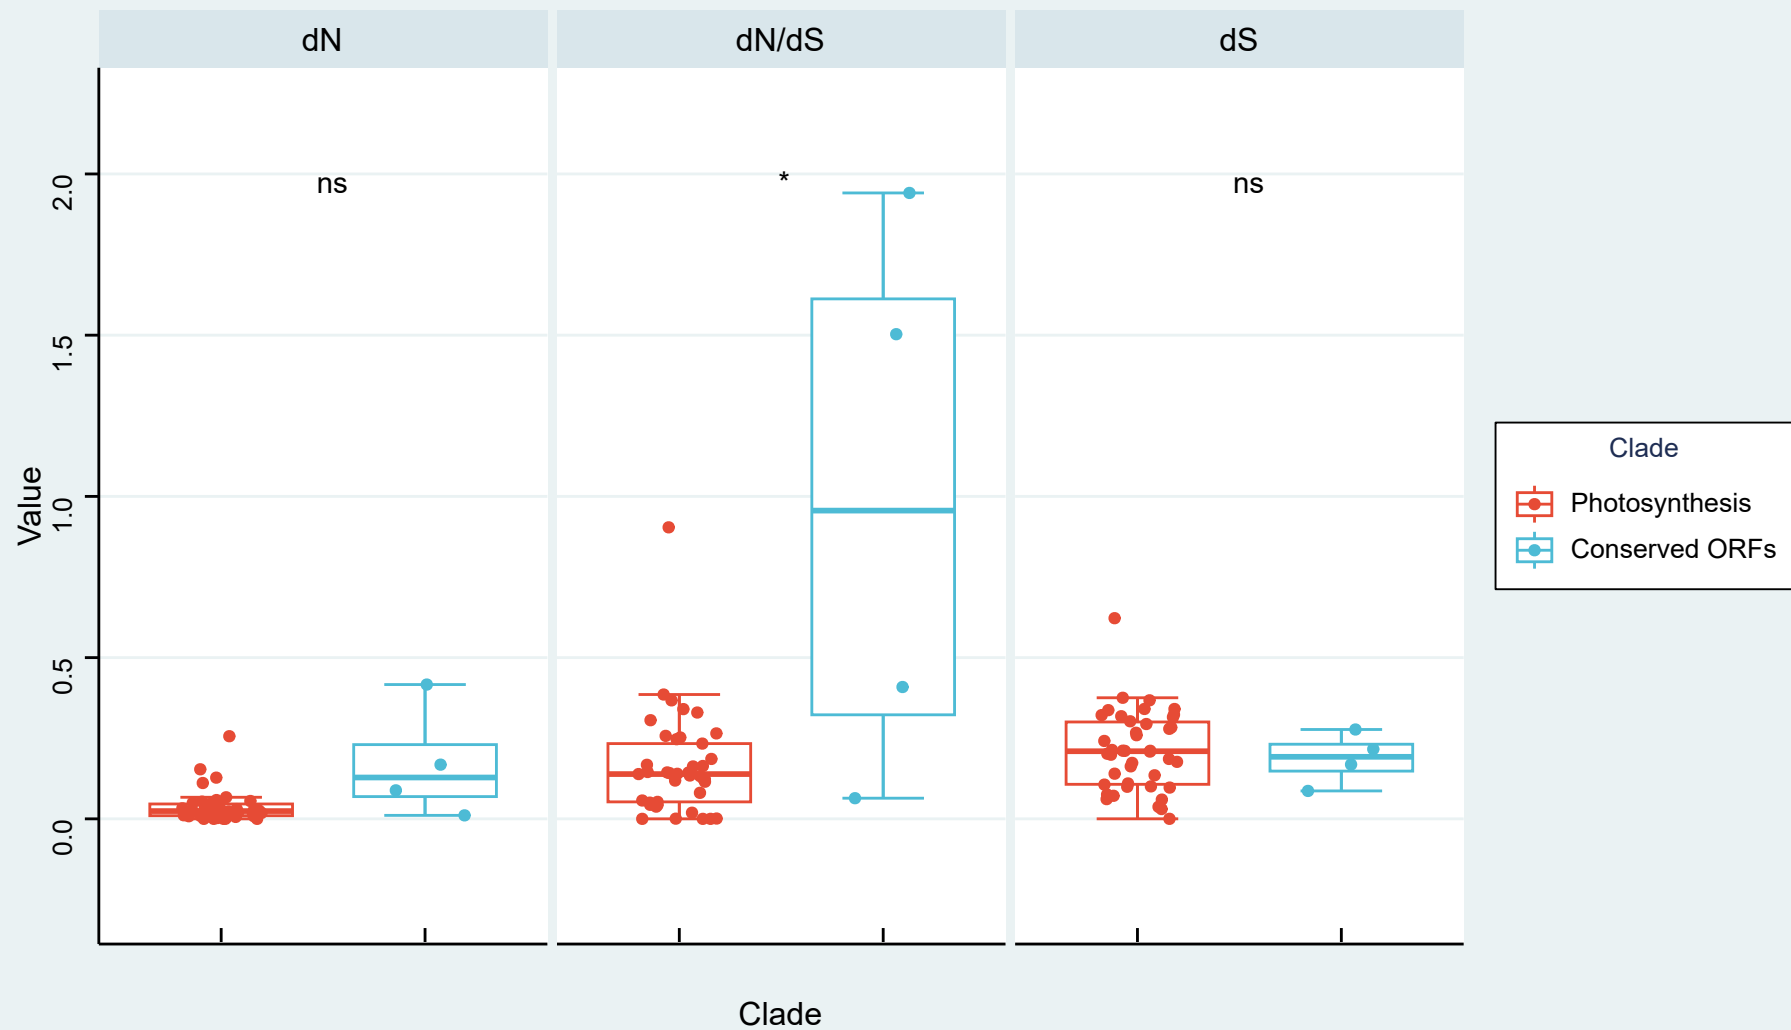

Supplement: s1 [file s1]

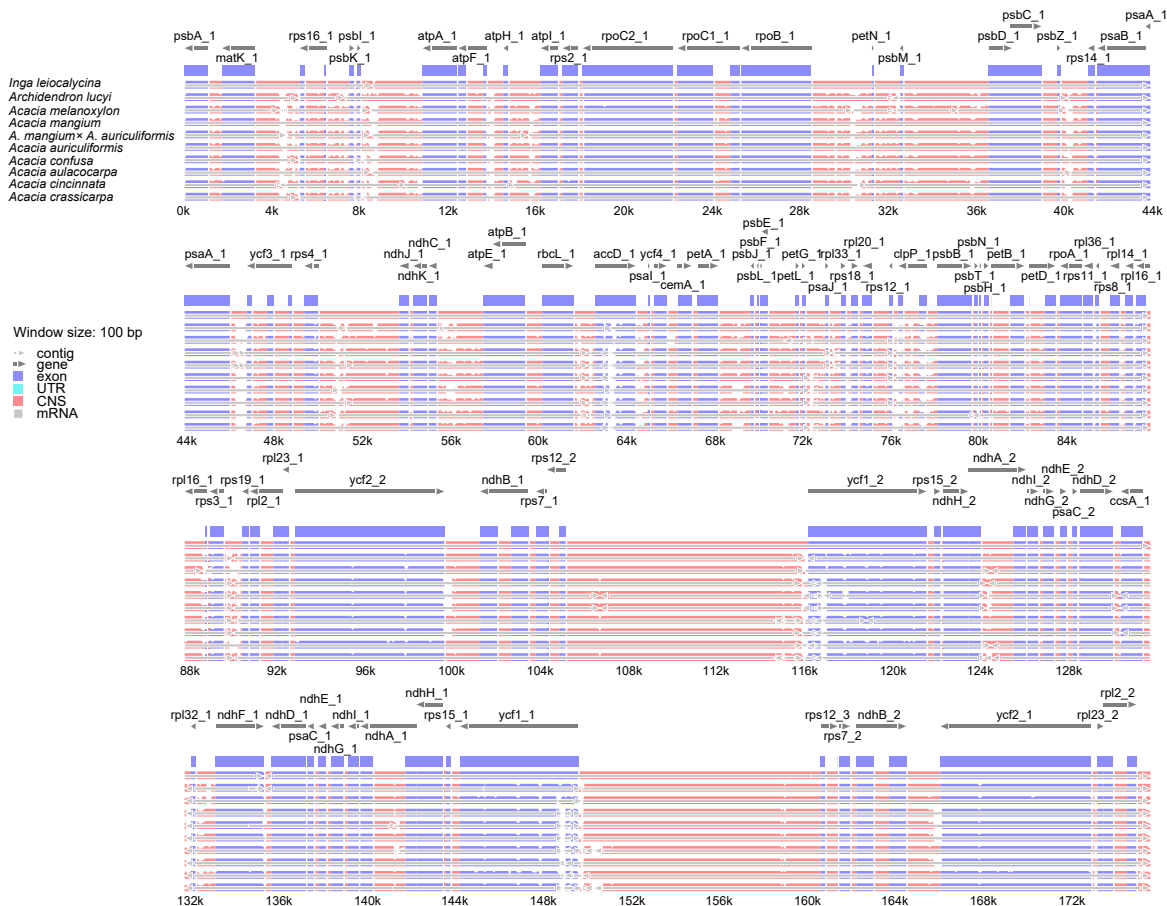

Supplement: s1 [file s1]
